# Supplementary material
Source: PubMed Central journal article supplement (PMC6417429)
Supplement: NIHMS1004594-supplement-1.pdf [file NIHMS1004594-supplement-1.pdf]

| Family/<br>Patient | Mutation                              | Polyphen<br>Prediction | Exome<br>variant<br>server:<br>date<br>accessed<br>11/27/201<br>2 | dbSNP<br>number | Inheritance | Brain/<br>Eye<br>Findings                                                     | Facial<br>Findings | Hand<br>Findings                                                     | Endocrinological<br>Findings                            | Other<br>Findings/<br>Notes                                                                                                        |
|--------------------|---------------------------------------|------------------------|-------------------------------------------------------------------|-----------------|-------------|-------------------------------------------------------------------------------|--------------------|----------------------------------------------------------------------|---------------------------------------------------------|------------------------------------------------------------------------------------------------------------------------------------|
| 1a                 | 2q14.2(121,696,089-121,814,359)x1mat  |                        |                                                                   |                 | Maternal    | Chiari I malformation, small ectopic pituitary                                | Midface hypoplasia | Right postaxial polydactyl y                                         | GH deficiency, neonatal hypoglycemia, failure to thrive | Advanced early milestones, full scale IQ 118                                                                                       |
| 1b                 | 2q14.2(121,696,089-121,814,359)x1mat  |                        |                                                                   |                 | Maternal    | Normal                                                                        | Midface hypoplasia | Postaxial skin changes in normal location for postaxial polydactyl y | Short stature-normal hormone levels                     | Mother of a, other family members in family with mutation (maternal grandmother and maternal uncle of a) but clinical data unknown |
| 1c                 | 2q.14.2(121,690,804-121,808,876)x1mat |                        |                                                                   |                 | Maternal    | Unknown                                                                       | Normal             | Bilateral postaxial polydactyl y                                     | GH deficiency                                           | Sister of a                                                                                                                        |
| 2                  | 2q14.2(121,651,782-121,803,391)x1     |                        |                                                                   |                 |             | Normal                                                                        | Bilateral CL/P     | Unknown                                                              | None                                                    | Single umbilical artery, fetus                                                                                                     |
| 3a                 | c.547G>A, p.Val183Met                 | Benign 0.003           |                                                                   |                 | Paternal    | Ectopic posterior pituitary, anterior pituitary hypoplasia, stalk abnormality | Normal             | Normal                                                               | GH deficiency                                           |                                                                                                                                    |
| 3b                 | c.547G>A, p.Val183Met                 | Benign 0.003           |                                                                   |                 | Paternal    | Normal                                                                        | Normal             | Normal                                                               | Normal height                                           | Brother of a                                                                                                                       |
| 3c                 | c.547G>A, p.Val183Met                 | Benign 0.003           |                                                                   |                 | Unknown     | Normal                                                                        | Normal             | Normal                                                               | Normal height                                           | Father of a                                                                                                                        |

|    |                          |                               |                  |                 |          |                                                                           |                                                                                                                                                                                                             |        |                                                                            |                                                                      |
|----|--------------------------|-------------------------------|------------------|-----------------|----------|---------------------------------------------------------------------------|-------------------------------------------------------------------------------------------------------------------------------------------------------------------------------------------------------------|--------|----------------------------------------------------------------------------|----------------------------------------------------------------------|
| 4  | c.607G>A,<br>p.Ala203Thr | Benign<br>0.004               | A=17/G=1<br>2987 | rs14704<br>4066 | Unknown  | Ectopic<br>posterior<br>pituitary,<br>anterior<br>pituitary<br>hypoplasia | Normal                                                                                                                                                                                                      | Normal | GH, TSH, ACTH,<br>FSH, LH, prolactin<br>deficiencies,<br>height SDS -5.5   | Forceps<br>delivery/<br>hypoxemia                                    |
| 5a | c.677G>A,<br>p.Arg226His | Probably<br>damaging<br>1.000 |                  |                 | Maternal | Semilobar<br>HPE,<br>upslanting<br>palpebral<br>fissures                  | MC,<br>bitemporal<br>narrowing,<br>upslanting<br>palpebral<br>fissures,<br>flat nasal<br>bridge,<br>short nose<br>w/<br>anteverted<br>nares,<br>broad and<br>deep<br>philtrum,<br>high-<br>arched<br>palate | Normal | Diabetes insipidus                                                         | Also with<br>pathogenic<br>ZIC2 mutation:<br>c.1206C>G,<br>p.Tyr402X |
| 5b | c.677G>A,<br>p.Arg226His | Probably<br>damaging<br>1.000 |                  |                 | Maternal | No HPE;<br>severe<br>develop<br>mental<br>delay                           | Normal                                                                                                                                                                                                      | Normal | None                                                                       | Also with<br>pathogenic<br>ZIC2 mutation:<br>c.1206C>G,<br>p.Tyr402X |
| 5c | c.677G>A,<br>p.Arg226His | Probably<br>damaging<br>1.000 |                  |                 | Unknown  | No HPE;<br>develop<br>mental<br>delay                                     | Normal                                                                                                                                                                                                      | Normal | None                                                                       | Also with<br>pathogenic<br>ZIC2 mutation:<br>c.1206C>G,<br>p.Tyr402X |
| 6  | c.757C>T,<br>p.Pro253Ser | Probably<br>damaging<br>1.000 |                  |                 | Unknown  | Ectopic<br>posterior<br>pituitary,<br>anterior<br>pituitary<br>hypoplasia | Normal                                                                                                                                                                                                      | Normal | GH, TSH<br>deficiencies,<br>partial ACTH<br>deficiency, height<br>SDS -3.5 | Breech<br>delivery                                                   |

|    |                          |                               |                  |                 |          |                                                                                              |                                                                                                                                                                                                                                                                |        |        |                                                                                                                                               |
|----|--------------------------|-------------------------------|------------------|-----------------|----------|----------------------------------------------------------------------------------------------|----------------------------------------------------------------------------------------------------------------------------------------------------------------------------------------------------------------------------------------------------------------|--------|--------|-----------------------------------------------------------------------------------------------------------------------------------------------|
| 7  | c.803C>T,<br>p.Ala268Val | Probably<br>damaging<br>1.000 | T=29/C=1<br>2977 | rs14699<br>2756 | Unknown  | Normal<br>CT,<br>normal<br>neuropsy<br>ch<br>develop<br>ment                                 | High<br>forehead,<br>flat facial<br>profile, low<br>nasal<br>bridge,<br>broad<br>nasal ridge,<br>hypoplastic<br>nasal<br>septum,<br>abnormal<br>and short<br>philtrum,<br>short<br>columella,<br>right cleft<br>lip with<br>preserved<br>palatal<br>structures | Normal | None   |                                                                                                                                               |
| 8  | c.803C>T,<br>p.Ala268Val | Probably<br>damaging<br>1.000 | T=29/C=1<br>2977 | rs14699<br>2756 | Unknown  | Ectopic<br>posterior<br>pituitary,<br>anterior<br>pituitary<br>hypoplasi<br>a                |                                                                                                                                                                                                                                                                | Normal | Normal | GH, TSH, FSH,<br>LH deficiencies,<br>partial ACTH<br>deficiency, height<br>SDS -3.2                                                           |
| 9a | c.803C>T,<br>p.Ala268Val | Probably<br>damaging<br>1.000 | T=29/C=1<br>2977 | rs14699<br>2756 | Unknown  | Optic<br>nerve<br>hypoplasi<br>a, absent<br>septum<br>pellucidu<br>m,<br>normal<br>pituitary |                                                                                                                                                                                                                                                                | Normal | Normal | Without endocrine<br>deficiencies                                                                                                             |
| 9b | c.803C>T,<br>p.Ala268Val | Probably<br>damaging<br>1.000 | T=29/C=1<br>2977 | rs14699<br>2756 | Maternal | Optic<br>nerve<br>hypoplasi<br>a, absent<br>septum<br>pellucidu<br>m,<br>schizenc<br>ephalo, |                                                                                                                                                                                                                                                                | Normal | Normal | Without endocrine<br>deficiencies<br><br>Forceps<br>delivery; is<br>also carrier of<br>the silent SHH<br>variation<br>c.213G>A,<br>p.Glu71Glu |

|     |                                           |                            |                  |                 |          |                                                                                       |                                                                         |                                 |                                                      |                               |
|-----|-------------------------------------------|----------------------------|------------------|-----------------|----------|---------------------------------------------------------------------------------------|-------------------------------------------------------------------------|---------------------------------|------------------------------------------------------|-------------------------------|
|     |                                           |                            |                  |                 |          | normal pituitary                                                                      |                                                                         |                                 |                                                      |                               |
| 9c  | c.803C>T,<br>p.Ala268Val                  | Probably damaging<br>1.000 | T=29/C=1<br>2977 | rs14699<br>2756 | Maternal | Normal                                                                                | Normal                                                                  | Normal                          | Normal height                                        | Sister of a                   |
| 9d  | c.803C>T,<br>p.Ala268Val                  | Probably damaging<br>1.000 | T=29/C=1<br>2977 | rs14699<br>2756 | Unknown  | Normal                                                                                | Normal                                                                  | Normal                          | Normal height                                        | Mother of a                   |
| 10a | c.864_866del<br>CC,<br>His289Profs*<br>61 |                            |                  |                 | Maternal | MRI with semilobar HPE, severe neurodevelopmental delay                               | Microcephaly, large cleft lip/palate involving partially the premaxilla | Bilateral postaxial polydactyly | None                                                 |                               |
| 10b | c.864_866del<br>CC,<br>His289Profs*<br>61 |                            |                  |                 | Unknown  | Not described                                                                         | Normal                                                                  | Postaxial polydactyly           | None                                                 | Mother of a                   |
| 11a | c.1121G>A,<br>p.Arg374His                 | Probably damaging<br>1.00  | A=1/G=13<br>005  |                 | Maternal | Unknown                                                                               | R CL/P                                                                  | Normal                          | None                                                 | None                          |
| 11b | c.1121G>A,<br>p.Arg374His                 | Probably damaging<br>1.00  | A=1/G=13<br>005  |                 | Unknown  | Not described                                                                         | Not described                                                           | Not described                   | Not described                                        | Mother of a                   |
| 12a | c.1138G>T,<br>p.Glu380X                   |                            |                  |                 | Maternal | hypoplastic anterior pituitary, post pituitary lobe was not visible, normal cognition | Normal                                                                  | Normal                          | TSH, ACTH, GH and ADH deficiencies, height SDS -2.9  |                               |
| 12b | c.1138G>T,<br>p.Glu380X                   |                            |                  |                 | Unknown  | Normal                                                                                | Normal                                                                  | Normal                          | None                                                 | Mother of a                   |
| 13  | c.1294G>A,<br>p.Val432Met                 | Probably damaging<br>0.990 | A=55/G=1<br>2951 | rs14229<br>6407 | Unknown  | Anterior pituitary hypoplasia                                                         | Normal                                                                  | Normal                          | GH, TSH, ACTH, FSH, LH deficiencies, height SDS -6.1 |                               |
| 14  | c.1294G>A,<br>p.Val432Met                 | Probably damaging<br>0.990 | A=55/G=1<br>2951 | rs14229<br>6407 | Unknown  | Ectopic posterior pituitary,                                                          | Normal                                                                  | Normal                          | GH, TSH, ACTH, FSH, LH deficiencies,                 | Breech delivery/<br>hypoxemia |

|     |                        |                         |              |             |          |                                                                           |                                                                                                                                                                    |                       |                                                                         |                                                    |
|-----|------------------------|-------------------------|--------------|-------------|----------|---------------------------------------------------------------------------|--------------------------------------------------------------------------------------------------------------------------------------------------------------------|-----------------------|-------------------------------------------------------------------------|----------------------------------------------------|
|     |                        |                         |              |             |          | anterior pituitary hypoplasia                                             |                                                                                                                                                                    |                       | height SDS --4.1                                                        |                                                    |
| 15  | c.1294G>A, p.Val432Met | Probably damaging 0.990 | A=55/G=12951 | rs142296407 | Unknown  | Not described                                                             | Normal                                                                                                                                                             | Normal                | GH, TSH, ACTH, FSH, LH deficiencies, height SDS -3.2                    |                                                    |
| 16  | c.1294G>A, p.Val432Met | Probably damaging 0.990 | A=55/G=12951 | rs142296407 | Unknown  | Ectopic posterior pituitary, normal anterior pituitary, stalk abnormality | Normal                                                                                                                                                             | Normal                | GH, TSH, ACTH, FSH, LH deficiencies                                     |                                                    |
| 17  | p.Trp441*              |                         |              |             | de novo  | Normal (except for pituitary)                                             | MC, Bilateral CL/P, Hypotelorism, SCI                                                                                                                              | Postaxial hexadactyly | GH deficiency, pituitary hypoplasia                                     | Sister with HPE (but no genetic testing performed) |
| 18  | c.1418G>A, p.Arg473His | Benign 0.188            | A=2/G=13004  | rs150170739 | Unknown  | Ectopic posterior pituitary, anterior pituitary hypoplasia                | Normal                                                                                                                                                             | Normal                | GH, TSH, FSH, LH deficiencies, partial ACTH deficiency, height SDS -7.7 |                                                    |
| 19a | c.1435C>G, p.Arg479Gly | Possibly damaging 0.894 |              | rs121917708 | Maternal | Mild gyral asymmetry in perisylvian areas                                 | Large ears, hypoplastic anterior nasal spine, hypotelorism, hypoplastic premaxilla, hypoplastic nose with flattened alae and nasal tip, poorly developed philtrum, | Normal                | None                                                                    | Also with PTCH: 2171 C>T, Thr328Met                |

|     |                        |                         |  |             |          |                                                                              |                                               |                        |                                                                    |                                               |
|-----|------------------------|-------------------------|--|-------------|----------|------------------------------------------------------------------------------|-----------------------------------------------|------------------------|--------------------------------------------------------------------|-----------------------------------------------|
|     |                        |                         |  |             |          |                                                                              | bilateral cleft lip/palate                    |                        |                                                                    |                                               |
| 19b | c.1435C>G, p.Arg479Gly | Possibly damaging 0.894 |  | rs121917708 | Unknown  | Normal                                                                       | Normal                                        | Normal                 | None                                                               | Mother of a                                   |
| 20a | c.1486C>T, p.Arg496X   |                         |  |             | Paternal | "HPE findings" (but detailed findings not available)                         | Not described                                 | Normal                 | None                                                               |                                               |
| 20b | c.1486C>T, p.Arg496X   |                         |  |             | Unknown  | Not described                                                                | Apparently normal                             | Normal                 | None                                                               | "Apparently normal", but no details available |
| 21a | c.1547G>C, p.Arg516Pro | Probably damaging 1.000 |  |             | Paternal | Mild anterior pituitary hypoplasia, maldescended posterior lobe of pituitary | Normal                                        | Unilateral polydactyly | GH deficiency, Hypothyroidism, LH/FSH deficiency, height SDS -3.13 |                                               |
| 21b | c.1547G>C, p.Arg516Pro | Probably damaging 1.000 |  |             | Unknown  | Normal                                                                       | Normal                                        | Normal                 | None                                                               | Father of a                                   |
| 22a | c.1683+1G>A=IVS11+1G>A |                         |  | rs140347335 | Paternal | Normal (though with DD)                                                      | HoT, single nares, midface hypoplasia, MC, CL | Normal                 | GH deficiency                                                      |                                               |
| 22b | c.1683+1G>A=IVS11+1G>A |                         |  | rs140347335 | Unknown  | Not described                                                                | Normal                                        | Normal                 | None                                                               | "Apparently normal", but no details available |

|     |                                                              |  |  |  |          |                                                                                                                                                                                                                              |                                                                                                                                                                                                             |                                                    |                                                                                                                 |                                   |
|-----|--------------------------------------------------------------|--|--|--|----------|------------------------------------------------------------------------------------------------------------------------------------------------------------------------------------------------------------------------------|-------------------------------------------------------------------------------------------------------------------------------------------------------------------------------------------------------------|----------------------------------------------------|-----------------------------------------------------------------------------------------------------------------|-----------------------------------|
| 23  | c.1809C>T,<br>Pro604Ser                                      |  |  |  | Unknown  | Agenesis of the right eyeglobe , agenesi s of the genu and body of the corpus collosu m with a thin rostru m, asymmet ric ventricles , migration defects, mainly in the right hemishp ere and abnormal cerebella r foliation | Hypertelori sm, prominent forehead, large anterior fontanel, right sided anophthal mia, small abnormall y modeled and posteriorly angulated ears, preauricula r tage, wide downturne d mouth and short neck | Normal                                             | None                                                                                                            |                                   |
| 24  | c.1908dupC,<br>p.Val637Argf<br>s*42                          |  |  |  | de novo  | Widening of the left tempora l horn, Pituitary gland not well seen but suboptim al study                                                                                                                                     | Microcepha ly, mildly up slanting palpebra l fissures, high narrow palate                                                                                                                                   | Bilateral postaxial polydactyl y in hands and feet | GH deficiency                                                                                                   | Atrio-ventricula r septu m defect |
| 25a | c.2081_2084 del,<br>p.Leu694fsX722,<br>c.1760C>T;<br>p.P608L |  |  |  | Paternal | Hypoplas tic anterior pituitary, ectopic posterior pituitary                                                                                                                                                                 | Cleft L/P, flat nasal bridge                                                                                                                                                                                | Normal                                             | Low levels of IGF-1, IGFBP3, deminished GH response after clinidine stimulation, severe GHD, subnormal cortisol | Unilatera l cryptorchidism        |

|     |                                                     |                         |             |             |                                                                                            |                                                                              |                      |             |                                             |                                           |
|-----|-----------------------------------------------------|-------------------------|-------------|-------------|--------------------------------------------------------------------------------------------|------------------------------------------------------------------------------|----------------------|-------------|---------------------------------------------|-------------------------------------------|
|     |                                                     |                         |             |             |                                                                                            |                                                                              |                      |             | response, partial ACTH def, height SDS -4.5 |                                           |
| 25b | c.2081_2084 del, p.Leu694fsX722, c.1760C>T; p.P608L |                         |             |             | Unknown                                                                                    | Normal                                                                       | Normal               | Normal      | Normal hormone levels, height -1.2 SDS      | Father of a, also with c.1760C>T, p.P608L |
| 26a | c.2140G>A, p.Ala714Thr (homozygous)                 | Benign 0.007            |             |             | Maternal and probably paternal (incestuous)                                                | Optic nerve hypoplasia, corpus callosum hypoplasia, normal pituitary         | Microcephaly         | Normal      | Without endocrine deficiencies              | Consanguineous parents (incestuous)       |
| 26b | c.2140G>A, p.Ala714Thr (heterozygous)               | Benign 0.007            |             |             | Maternal or paternal (incestuous)                                                          | Normal                                                                       | Normal               | Normal      | Normal height                               | Sister of a                               |
| 26c | c.2140G>A, p.Ala714Thr (heterozygous)               | Benign 0.007            |             |             | Probably paternal (mother's father is also the father of the index patient and her sister) | Normal                                                                       | Normal               | Normal      | Normal height                               | Mother of a                               |
| 27  | c.2261G>A, p.ArgR754Gln                             | Probably damaging 1.000 | A=4/G=13002 | rs144782119 | Unknown                                                                                    | Not described                                                                | B/L cleft lip/palate | Polydactyly | Not described                               |                                           |
| 28a | c.2281C>T, p.Leu761Phe                              | Possibly damaging 0.933 |             |             | Maternal                                                                                   | Optic nerve hypoplasia, absent septum pellucidum, corpus callosum hypoplasia | schizencephaly       | Normal      | Normal                                      | GH, TSH, ACTH deficiencies                |



|     |                                           |                               |                 |  |          |                                                                                                                                                                                                                                                                           |                                            |                                        |                                                                       |                                                                                    |
|-----|-------------------------------------------|-------------------------------|-----------------|--|----------|---------------------------------------------------------------------------------------------------------------------------------------------------------------------------------------------------------------------------------------------------------------------------|--------------------------------------------|----------------------------------------|-----------------------------------------------------------------------|------------------------------------------------------------------------------------|
|     |                                           |                               |                 |  |          | ephaly,<br>normal<br>pituitary                                                                                                                                                                                                                                            |                                            |                                        |                                                                       |                                                                                    |
| 28b | c.2281C>T,<br>p.Leu761Phe                 | Possibly<br>damaging<br>0.933 |                 |  | Unknown  | Normal                                                                                                                                                                                                                                                                    | Normal                                     | Normal                                 | Normal height                                                         | Mother of a                                                                        |
| 29  | c.2339C>T,<br>p.Ala780Val                 | Benign<br>0.032               | T=1/C=12<br>561 |  | Unknown  | Unknown                                                                                                                                                                                                                                                                   | Normal                                     | Normal                                 | GH, TSH, ACTH<br>deficiencies,<br>height SDS -3.3                     |                                                                                    |
| 30a | c.2362_2368<br>del,<br>p.Leu788fsX<br>794 |                               |                 |  | Maternal | severe<br>delay of<br>neuropsychomotor<br>development,<br>diminished brain<br>size,<br>asymmetry of<br>cerebral hemispheres<br>probably secondary to<br>repeated hypoglycemia,<br>hypoplastic anterior<br>pituitary, ectopic<br>post pituitary<br>lobe at median eminence | Absence of<br>midline<br>facial<br>defects | Bilateral<br>postaxial<br>polydactyly  | ACTH, GH, TSH<br>and gonadotropin<br>deficiencies,<br>height SDS -5.4 | Tonic-clonic<br>seizures, VUR,<br>multiple UTIs,<br>high pitched<br>voice          |
| 30b | c.2362_2368<br>del,<br>p.Leu788fsX<br>794 |                               |                 |  | Maternal | Normal<br>cognition                                                                                                                                                                                                                                                       | Normal                                     | Unilateral<br>postaxial<br>polydactyly | No deficiencies,<br>height SDS -1.0                                   | Mom of a, also<br>with GLI2<br>variant<br>c.4332G>C,<br>p.M144I and<br>c.4333 C>T, |

|     |                                 |  |  |  |          |                                                                                                                                                                               |        |                                                   |                                                                                             |                                                                                                                         |
|-----|---------------------------------|--|--|--|----------|-------------------------------------------------------------------------------------------------------------------------------------------------------------------------------|--------|---------------------------------------------------|---------------------------------------------------------------------------------------------|-------------------------------------------------------------------------------------------------------------------------|
|     |                                 |  |  |  |          |                                                                                                                                                                               |        |                                                   |                                                                                             | p.L1445F heterozygotes both come after stop codon                                                                       |
| 30c | c.2362_2368 del, p.Leu788fsX794 |  |  |  | Maternal | Hypoplastic anterior pituitary, ectopic posterior lobe near the infundibulum and dilated vessels, normal cognition                                                            | Normal | Postaxial polydactyly in the left hand            | Severe short stature, IGHD, height SDS -4.2                                                 | Uncle of a, also with GLI2 variant c.4332G>C, p.M144I and c.4333 C>T, p.L1445F heterozygotes both come after stop codon |
| 30d | c.2362_2368 del, p.Leu788fsX794 |  |  |  | Maternal | Normal cognition, hypoplastic anterior pituitary, thin pituitary stalk, ectopic posterior pituitary at the infundibulum, ventricular dilation, sequelae of severe head trauma | Normal | Bilateral postaxial polydactyly                   | GHD, fathered 4 children, low serum testosterone evolving post head trauma, height -3.0 SDS | Uncle of a, also with GLI2 variant c.4332G>C, p.M144I and c.4333 C>T, p.L1445F heterozygotes both come after stop codon |
| 30e | c.2362_2368 del, p.Leu788fsX794 |  |  |  | Paternal | Normal cognition, hypoplastic anterior pituitary,                                                                                                                             | Normal | Bilateral postaxial polydactyly in hands and feet | Severe short stature, height SDS -4.9, lack of pubertal development, primary                | Cousin of a, daughter of d, also with GLI2 variant c.4332G>C, p.M144I and                                               |

|     |                                 |  |  |  |          |                                                                                                                       |        |                       |                                                                                         |                                                                                                                          |
|-----|---------------------------------|--|--|--|----------|-----------------------------------------------------------------------------------------------------------------------|--------|-----------------------|-----------------------------------------------------------------------------------------|--------------------------------------------------------------------------------------------------------------------------|
|     |                                 |  |  |  |          | thin pituitary stalk, ectopic post pituitary, anomalous venous development L frontal lobe and R cerebellar hemisphere |        |                       | amenorrhea, GH, TSH and gonadotropin deficiencies, no clinical signs of hypocortisolism | c.4333 C>T, p.L1445F heterozygotes both come after stop codon                                                            |
| 30f | c.2362_2368 del, p.Leu788fsX794 |  |  |  | Maternal | Not described                                                                                                         | Normal | Postaxial polydactyly | None, height SDS +0.7                                                                   | Sister of a, also with GLI2 variant c.4332G>C, p.M144I and c.4333 C>T, p.L1445F heterozygotes both come after stop codon |
| 30g | c.2362_2368 del, p.Leu788fsX794 |  |  |  | paternal | Not described                                                                                                         | Normal | Postaxial polydactyly | None                                                                                    | Cousin of a, also with GLI2 variant c.4332G>C, p.M144I and c.4333 C>T, p.L1445F heterozygotes both come after stop codon |
| 30h | c.2362_2368 del, p.Leu788fsX794 |  |  |  | Maternal | Not described                                                                                                         | Normal | Postaxial polydactyly | None, height SDS -0.6                                                                   | Father of g, also with GLI2 variant c.4332G>C, p.M144I and c.4333 C>T,                                                   |

|     |                                 |              |  |  |          |                                                            |               |                       |                                                                         |                                                                                                                                   |
|-----|---------------------------------|--------------|--|--|----------|------------------------------------------------------------|---------------|-----------------------|-------------------------------------------------------------------------|-----------------------------------------------------------------------------------------------------------------------------------|
|     |                                 |              |  |  |          |                                                            |               |                       |                                                                         | p.L1445F heterozygotes both come after stop codon                                                                                 |
| 30i | c.2362_2368 del, p.Leu788fsX794 |              |  |  | Unknown  | Not described                                              | Normal        | Postaxial polydactyly | None, height SDS -2.9                                                   | Mother of h, b, c, d, also with GLI2 variant c.4332G>C, p.M144I and c.4333 C>T, p.L1445F heterozygotes both come after stop codon |
| 31  | c.2488T>C, p.Phe830Leu          | Benign 0.034 |  |  | Unknown  | Ectopic posterior pituitary, anterior pituitary hypoplasia | Normal        | Normal                | GH, TSH, FSH, LH deficiencies, partial ACTH deficiency, height SDS -4.3 | Forceps delivery                                                                                                                  |
| 32a | c.2773C>T, p.Gln925X            |              |  |  | Paternal | Aplasia of pituitary                                       | Not described | Postaxial polydactyly | Not described                                                           |                                                                                                                                   |
| 32b | c.2773C>T, p.Gln925X            |              |  |  | Paternal | Not described                                              | Not described | Polydactyly           | Not described                                                           | Father of a                                                                                                                       |
| 32c | c.2773C>T, p.Gln925X            |              |  |  | Paternal | Empty sella                                                | Not described | Postaxial polydactyly | Panhypopituitarism                                                      | Paternal Uncle of a                                                                                                               |
| 32d | c.2773C>T, p.Gln925X            |              |  |  | Unknown  | Not described                                              | Not described | Polydactyly           | Not described                                                           | Paternal grandfather of a                                                                                                         |
| 33a | c.2798G>A, p.Arg933His          | Benign 0.001 |  |  | Maternal | Ectopic posterior pituitary, anterior pituitary hypoplasia | Normal        | Normal                | GH, TSH deficiencies, partial ACTH deficiency, height SDS -4.8          | Breech delivery/preterm                                                                                                           |
| 33b | c.2798G>A, p.Arg933His          | Benign 0.001 |  |  | Unknown  | Not described                                              | Normal        | Normal                | Normal hormone levels, height SD -3.0                                   | Mother of a                                                                                                                       |

|     |                               |                 |  |  |          |                                                                                                                                                       |                                             |                       |                                                  |                                                                                 |
|-----|-------------------------------|-----------------|--|--|----------|-------------------------------------------------------------------------------------------------------------------------------------------------------|---------------------------------------------|-----------------------|--------------------------------------------------|---------------------------------------------------------------------------------|
| 34a | c.2840G>A,<br>p.Gly947Asp     | Benign<br>0.427 |  |  | Maternal | Not visible posterior pituitary, anterior pituitary hypoplasia, abnormal cerebral periventricular venous system, delayed neuropsychomotor development | Epicanthus, palpebral ptosis, micrognathia, | Normal                | GH, TSH, ACTH, ADH deficiencies, height SDS -5.5 | Breech/preterm, perineal hypospadias, diabetes insipidus, cryptorchidism, 46 XY |
| 34b | c.2840G>A,<br>p.Gly947Asp     | Benign<br>0.427 |  |  | Unknown  | Not described                                                                                                                                         | Normal                                      | Normal                | Normal hormone levels, height -3.7 SD            | Mother of a                                                                     |
| 35a | c.3258del1,<br>p.Tyr1086fs*42 |                 |  |  | Paternal | Normal brain except pituitary absence, optic nerve hypoplasia                                                                                         | CL/P                                        | Postaxial polydactyly | Panhypopituitarism                               |                                                                                 |
| 35b | c.3258del1,<br>p.Tyr1086fs*42 |                 |  |  | Paternal | Not described                                                                                                                                         | Not described                               | Normal                | Panhypopituitarism                               | Dizygotic twin had similar findings, but no molecular testing was performed     |
| 35c | c.3258del1,<br>p.Tyr1086fs*42 |                 |  |  | Unknown  | Not described, normal intelligence                                                                                                                    | Normal                                      | Postaxial polydactyly | None                                             | Family history notable for other individuals with CL/P and polydactyly          |
| 35d | c.3258del1,<br>p.Tyr1086fs*42 |                 |  |  | Unknown  | Not described, normal                                                                                                                                 | Normal                                      | Postaxial polydactyly | None                                             | Family history notable for other                                                |

|     |                                                               |                 |                  |                 |          |                                                                                                     |                                                           |                                           |                                                                    |                                                                                                                   |
|-----|---------------------------------------------------------------|-----------------|------------------|-----------------|----------|-----------------------------------------------------------------------------------------------------|-----------------------------------------------------------|-------------------------------------------|--------------------------------------------------------------------|-------------------------------------------------------------------------------------------------------------------|
|     |                                                               |                 |                  |                 |          | intelligen<br>ce                                                                                    |                                                           |                                           |                                                                    | individuals with<br>CL/P and<br>polydactyly                                                                       |
| 36  | c.3294_3295<br>delAC,<br>p.Arg1098SerfsX43                    |                 |                  |                 | Unknown  | MRI with<br>aplastic<br>anterior<br>pituitary,<br>otherwise<br>normal,<br>normal<br>develop<br>ment | Deep<br>nasolabial<br>sulcus and<br>midface<br>hypoplasia | Bilateral<br>postaxial<br>polydactyl<br>y | Panhypopituitaris<br>m,<br>hypogonadotropic<br>hypogonadism        | Sandle gap<br>toes,<br>micropenis,<br>bilateral<br>cryptorchidism,<br>wide spaced<br>nipples, bifid<br>epiglottis |
| 37  | c.3317G>A,<br>p.Gly1106Asp                                    | Benign<br>0.220 |                  |                 | Unknown  | Not<br>describe<br>d                                                                                | R CL/P                                                    | Normal                                    | None                                                               |                                                                                                                   |
| 38  | c.3349G>T,<br>p.Val1117Leu                                    | Benign<br>0.001 | T=29/G=1<br>2977 | rs14758<br>0961 | Unknown  | Ectopic<br>posterior<br>pituitary,<br>anterior<br>pituitary<br>hypoplasi<br>a                       | Normal                                                    | Normal                                    | GH, TSH, FSH,<br>LH deficiencies,<br>height SDS -7.4               |                                                                                                                   |
| 39  | c.3349G>T,<br>p.Val1117Leu                                    | Benign<br>0.001 | T=29/G=1<br>2977 | rs14758<br>0961 | Unknown  | Not<br>visible<br>posterior<br>pituitary,<br>anterior<br>pituitary<br>hypoplasi<br>a                | Normal                                                    | Normal                                    | GH, TSH, ACTH,<br>FSH, LH, ADH<br>deficiencies,<br>height SDS -5.5 | Diabetes<br>insipidus                                                                                             |
| 40a | c.3351C>A;<br>3555delC;<br>p.Pro1184Gln;<br>p.Tyr1186Thrfs*34 | Benign<br>0.012 |                  |                 | Maternal | Pituitary<br>hypoplasi<br>a, chiari I<br>malforma<br>tion                                           | Solitary<br>median<br>maxillatry<br>central<br>incisor    | Unknown                                   | Panhypopituitaris<br>m                                             |                                                                                                                   |
| 40b | c.3351C>A;<br>3555delC;<br>p.Pro1184Gln;<br>p.Tyr1186Thrfs*34 | Benign<br>0.012 |                  |                 | Unknown  | Not<br>describe<br>d                                                                                | Not<br>described                                          | Unknown                                   | Unknown                                                            | Mother of a                                                                                                       |
| 41  | c.3382C>T,<br>p.Gln1128*                                      |                 |                  |                 | Unknown  | MRI with<br>present<br>corpus<br>callosum,                                                          | Prominent<br>medial<br>epicanthic<br>folds, flat          | Mild<br>brachyda<br>ctyly,<br>minimal     | Panhypopituitaris<br>m                                             | Dislocated<br>hips; Also with<br>324kb deletion<br>at 6p26 which                                                  |

|     |                                                  |                                       |              |                          |          |                                                                                                                                                          |                                                                                                                                                                        |                                    |                                        |                                                           |
|-----|--------------------------------------------------|---------------------------------------|--------------|--------------------------|----------|----------------------------------------------------------------------------------------------------------------------------------------------------------|------------------------------------------------------------------------------------------------------------------------------------------------------------------------|------------------------------------|----------------------------------------|-----------------------------------------------------------|
|     |                                                  |                                       |              |                          |          | no HPE, optic tracts and chiasm normal, ant pituitary small and post pit ectopic, develop mental delay                                                   | nasal bridge, broad nose and wide mouth                                                                                                                                | unilateral postaxial polydactyl y  |                                        | deletes PARK2, Parents blood sent and pending             |
| 42  | c.3502C>T, p.Gln1168X                            |                                       |              |                          | de novo  | Hypoplastic pituitary with posterior pituitary ectopically placed, pontocerebellar hypoplasia, temporobasal dysgyria, develop mental delay, microcephaly | Brachycephalic skull, bitemporal narrowing, low frontal hairline, peri-orbital fullness, some flaring of the medial eyebrows, a full, fleshy nasal tip, thin upper lip | Postaxial polydactyl y in one hand | Panhypopituitarism                     | Atypical VSD, micropenis, bifid uvula, high arched palate |
| 43  | c.3590G>A, p.Gly1197Asp                          | Benign 0.000                          | A=63/G=12827 | rs114823319              | Unknown  | Normal                                                                                                                                                   | Normal                                                                                                                                                                 | Normal                             | GH deficiency, height SDS -2.0         |                                                           |
| 44  | c.3638C>A, p.Ser1213Tyr                          | Possibly damaging 0.845               |              |                          | Unknown  | Not described                                                                                                                                            | Bilateral CL/P                                                                                                                                                         | Normal                             | None                                   |                                                           |
| 45a | c.3723G>A, p.Met1241Ile; c.4453C>G, p.Pro1485Ala | Benign 0.001; Possibly damaging 0.666 | G=2/C=13004  | rs138191075; rs145958673 | Paternal | Ectopic posterior pituitary, anterior pituitary hypoplasia                                                                                               | Normal                                                                                                                                                                 | Normal                             | GH deficiency, partial ACTH deficiency |                                                           |

|     |                                                           |                                                   |                                         |                                     |          |                                                                                      |                  |                              |                                                                          |                                                                                                            |
|-----|-----------------------------------------------------------|---------------------------------------------------|-----------------------------------------|-------------------------------------|----------|--------------------------------------------------------------------------------------|------------------|------------------------------|--------------------------------------------------------------------------|------------------------------------------------------------------------------------------------------------|
|     |                                                           |                                                   |                                         |                                     |          | a                                                                                    |                  |                              |                                                                          |                                                                                                            |
| 45b | c.3723G>A,<br>p.Met1241Ile;<br>c.4453C>G,<br>p.Pro1485Ala | Benign<br>0.001;<br>Possibly<br>damaging<br>0.666 | G=2/C=13<br>004                         | rs13819<br>1075;<br>rs14595<br>8673 | Unknown  | Not<br>describe<br>d                                                                 | Normal           | Normal                       | Normal hormone<br>levels, height -<br>2.2SD                              | Father of a                                                                                                |
| 46a | c.3768C>T,<br>p.Gln1256X                                  |                                                   |                                         |                                     | Paternal | Normal<br>except<br>pituitary<br>aplasia                                             | Not<br>described | Postaxial<br>polydactyl<br>y | Panhypopituitaris<br>m                                                   | PDA,<br>microphallus                                                                                       |
| 46b | c.3768C>T,<br>p.Gln1256X                                  |                                                   |                                         |                                     | Paternal | Normal<br>except<br>pituitary<br>aplasia                                             | Normal           | Postaxial<br>polydactyl<br>y | Panhypopituitaris<br>m                                                   | Bilateral<br>cryptorchidism<br>and<br>microphallus<br>(presumably<br>related to<br>pituitary<br>anomalies) |
| 46c | c.3768C>T,<br>p.Gln1256X                                  |                                                   |                                         |                                     | Unknown  | Not<br>describe<br>d                                                                 | Not<br>described | Postaxial<br>polydactyl<br>y | No abnormalities<br>described                                            |                                                                                                            |
| 47  | c.3943C>T,<br>p.Pro1315Ser                                | Benign<br>0.001                                   | T=245/C=<br>12759                       | rs11437<br>6238                     | Unknown  | Not<br>visible<br>posterior<br>pituitary,<br>anterior<br>pituitary<br>hypoplasi<br>a | Normal           | Normal                       | GH, TSH, ACTH,<br>FSH, LH, prolactin<br>deficiencies,<br>height SDS -4.1 |                                                                                                            |
| 48  | c.4054A>G,<br>p.Met1352Val;<br>c.4558G>A,<br>p.Asp1520Asn | Benign<br>0.000;<br>Probably<br>damaging<br>1.000 | G=138/A=<br>12770;<br>A=142/G=<br>12864 | rs14914<br>0724;                    | Unknown  | Ectopic<br>posterior<br>pituitary,<br>anterior<br>pituitary<br>hypoplasi<br>a        | Normal           | Normal                       | GH, TSH, ACTH,<br>FSH, LH<br>deficiencies,<br>height SDS -4.4            |                                                                                                            |
| 49  | c.4054A>G,p<br>.Met1352Val;<br>c.4558G>A,<br>p.Asp1520Asn | Benign<br>0.000;<br>Probably<br>damaging<br>1.000 | G=138/A=<br>12770;<br>A=142/G=<br>12864 |                                     | Unknown  | Ectopic<br>posterior<br>pituitary,<br>anterior<br>pituitary<br>hypoplasi<br>a        | Normal           | Normal                       | GH, FSH, LH<br>deficiencies,<br>height SDS -4.0                          |                                                                                                            |
| 50  | c.4054A>G,p<br>.Met1352Val;                               | Benign<br>0.000;                                  | G=138/A=<br>12770;                      |                                     | Unknown  | Ectopic<br>posterior                                                                 | Normal           | Normal                       | GH, TSH, FSH,<br>LH deficiencies,                                        |                                                                                                            |



|     |                                                           |                                                   |                                         |                 |              |                                                                                                     |                                                              |                  |                                               |                                                                                                                          |
|-----|-----------------------------------------------------------|---------------------------------------------------|-----------------------------------------|-----------------|--------------|-----------------------------------------------------------------------------------------------------|--------------------------------------------------------------|------------------|-----------------------------------------------|--------------------------------------------------------------------------------------------------------------------------|
|     | c.4558G>A,<br>p.Asp1520Asn                                | Probably<br>damaging<br>1.000                     | A=142/G=<br>12864                       |                 |              | pituitary,<br>anterior<br>pituitary<br>hypoplasia                                                   |                                                              |                  | height SDS -8.4                               |                                                                                                                          |
| 51  | c.4054A>G,p<br>.Met1352Val;<br>c.4558G>A,<br>p.Asp1520Asn | Benign<br>0.000;<br>Probably<br>damaging<br>1.000 | G=138/A=<br>12770;<br>A=142/G=<br>12864 |                 | Unknown      | Ectopic<br>posterior<br>pituitary,<br>anterior<br>pituitary<br>hypoplasia                           | Normal                                                       | Normal           | GH, TSH<br>deficiencies,<br>height SDS -2.3   |                                                                                                                          |
| 52a | c.4054A>G,<br>p.Met1352Val;<br>c.4558G>A,<br>p.Asp1520Asn | Benign<br>0.000;<br>Probably<br>damaging<br>1.000 | G=138/A=<br>12770;<br>A=142/G=<br>12864 |                 | Maternal     | Ectopic<br>posterior<br>pituitary,<br>small<br>anterior<br>lobe and<br>absent<br>pituitary<br>stalk | Normal                                                       | Normal           | GH, TSH, ACTH<br>deficiencies                 | Hemangioma<br>on the left ear,<br>micropenis,<br>cryptorchidism                                                          |
| 52b | c.4054A>G,<br>p.Met1352Val;<br>c.4558G>A,<br>p.Asp1520Asn | Benign<br>0.000;<br>Probably<br>damaging<br>1.000 | G=138/A=<br>12770;<br>A=142/G=<br>12864 |                 | Unknown      | Normal                                                                                              | Normal                                                       | Normal           | Normal                                        | Mother of a                                                                                                              |
| 53a | c.4054A>G,<br>p.Met1352Val;<br>c.4558G>A,<br>p.Asp1520Asn | Benign<br>0.000;<br>Probably<br>damaging<br>1.000 | G=138/A=<br>12770;<br>A=142/G=<br>12864 |                 | Unknown      | Unknown                                                                                             | Unknown                                                      | Unknown          | Multiple pituitary<br>hormone<br>deficiencies |                                                                                                                          |
| 54  | c.4315G>A,<br>p.Ala1439Thr                                | Benign<br>0.000                                   |                                         |                 | Not paternal | Ectopic<br>posterior<br>pituitary,<br>anterior<br>pituitary<br>hypoplasia                           | Solitary<br>median<br>maxillary<br>central<br>incisor        | Not<br>described | GH deficiency                                 | Also with<br>c.2362_2368del,<br>p.Leu788fsX794<br>and with<br>c.4332G>A,<br>p.Met1444Ile;<br>c.4333C>T,<br>p.Leu1445Phe. |
| 55  | c.4332G>A,<br>p.Met1444Ile                                | Benign<br>0.013                                   | A=10/G=1<br>2996                        | rs14646<br>7786 | Unknown      | Atresia of<br>the left<br>choana,<br>hypoplasia<br>of the                                           | Prominent<br>forehead,<br>facial<br>asymmetry,<br>small left | Normal           | None                                          | Choanal<br>atresia,<br>hypoplasia of L<br>frontal and<br>maxillary                                                       |

|    |                                                  |                                       |                              |                            |         |                                                                                                                            |                                                                                                                                     |        |                                                                         |                                                                                |
|----|--------------------------------------------------|---------------------------------------|------------------------------|----------------------------|---------|----------------------------------------------------------------------------------------------------------------------------|-------------------------------------------------------------------------------------------------------------------------------------|--------|-------------------------------------------------------------------------|--------------------------------------------------------------------------------|
|    |                                                  |                                       |                              |                            |         | left frontal and maxillary sinuses, abnormal pneumatization of the right paranasal sinus, mild left-sided septal deviation | orbit, ptosis, L heminasal hypoplasia with a small nasolacrimal pit and nasolacrimal atresia, L ear retroposition (mild), open bite |        |                                                                         | sinuses, abnormal pneumatization of R paranasal sinus, mild L septal deviation |
| 56 | c.4332G>A, p.Met1444Ile; c.4333C>T, p.Leu1445Phe | Benign 0.013; Possibly damaging 0.808 | A=10/G=1 2996; T=10/C=1 2996 | rs14646 7786; rs14620 7623 | Unknown | Ectopic posterior pituitary, anterior pituitary hypoplasia                                                                 | Normal                                                                                                                              | Normal | GH, TSH, ACTH, FSH, LH deficiencies, height SDS -5.3                    |                                                                                |
| 57 | c.4332G>A, p.Met1444Ile; c.4333C>T, p.Leu1445Phe | Benign 0.013; Possibly damaging 0.808 | A=10/G=1 2996; T=10/C=1 2996 | rs14646 7786; rs14620 7623 | Unknown | Not visible posterior pituitary, anterior pituitary hypoplasia                                                             | Normal                                                                                                                              | Normal | GH, TSH, ACTH, FSH, LH deficiencies, height SDS -5.7                    |                                                                                |
| 58 | c.4332G>A, p.Met1444Ile; c.4333C>T, p.Leu1445Phe | Benign 0.013; Possibly damaging 0.808 | A=10/G=1 2996; T=10/C=1 2996 | rs14646 7786; rs14620 7623 | Unknown | Ectopic posterior pituitary, anterior pituitary hypoplasia                                                                 | Normal                                                                                                                              | Normal | GH, TSH, FSH, LH deficiencies, partial ACTH deficiency, height SDS -6.3 |                                                                                |
| 59 | c.4332G>A, p.Met1444Ile; c.4333C>T, p.Leu1445Phe | Benign 0.013; Possibly damaging 0.808 | A=10/G=1 2996; T=10/C=1 2996 | rs14646 7786; rs14620 7623 | Unknown | Ectopic posterior pituitary, anterior pituitary hypoplasia                                                                 | Normal                                                                                                                              | Normal | GH, TSH, ACTH, FSH, LH deficiencies, height SDS -3.0                    |                                                                                |

|     |                                                           |                                                   |                                       |                                     |         |                                                                                                                                                                                                                       |        |                  |                                          |                    |
|-----|-----------------------------------------------------------|---------------------------------------------------|---------------------------------------|-------------------------------------|---------|-----------------------------------------------------------------------------------------------------------------------------------------------------------------------------------------------------------------------|--------|------------------|------------------------------------------|--------------------|
| 60a | c.4332G>A,<br>p.Met1444Ile;<br>c.4333C>T,<br>p.Leu1445Phe | Benign<br>0.013;<br>Possibly<br>damaging<br>0.808 | A=10/G=1<br>2996;<br>T=10/C=1<br>2996 | rs14646<br>7786;<br>rs14620<br>7623 | Unknown | Hypoplastic<br>adenohy<br>pophysis<br>with<br>neurohyp<br>ophys<br>identified<br>in the<br>posterior<br>portion of<br>the sella.<br>Pituitary<br>stalk was<br>normal in<br>size and<br>infundibul<br>um was<br>normal | Normal | Normal           | GH, TSH, FSH,<br>LH deficiencies         | Sister of b        |
| 60b | c.4332G>A,<br>p.Met1444Ile;<br>c.4333C>T,<br>p.Leu1445Phe | Benign<br>0.013;<br>Possibly<br>damaging<br>0.808 | A=10/G=1<br>2996;<br>T=10/C=1<br>2996 | rs14646<br>7786;<br>rs14620<br>7623 | Unknown | Hypoplastic<br>anterior<br>lobe and<br>normal<br>location<br>of<br>neurohyp<br>ophys<br>is                                                                                                                            | Normal | Normal           | GH, TSH, FSH,<br>LH deficiencies         | Sister of a        |
| 61a | c.4332G>A,<br>p.Met1444Ile;<br>c.4333C>T,<br>p.Leu1445Phe | Benign<br>0.013;<br>Possibly<br>damaging<br>0.808 | A=10/G=1<br>2996;<br>T=10/C=1<br>2996 | rs14646<br>7786;<br>rs14620<br>7623 | Unknown | Ectopic<br>posterior<br>pituitary,<br>anterior<br>pituitary<br>hypoplasia                                                                                                                                             | Normal | Not<br>described | GH, TSH, ACTH<br>deficiencies            | Breech<br>delivery |
| 61b | c.4332G>A,<br>p.Met1444Ile;<br>c.4333C>T,<br>p.Leu1445Phe | Benign<br>0.013;<br>Possibly<br>damaging<br>0.808 | A=10/G=1<br>2996;<br>T=10/C=1<br>2996 | rs14646<br>7786;<br>rs14620<br>7623 | Unknown | Ectopic<br>posterior<br>pituitary,<br>anterior<br>pituitary<br>hypoplasia,<br>stalk<br>interrupti<br>on                                                                                                               | Normal | Not<br>described | GH, TSH, FSH,<br>LH, PRL<br>deficiencies |                    |

|     |                                                                                                         |                                                   |                                       |                                     |          |                                                                                                    |                                                                                                                                                                                                                                             |                  |               |                                                                                                                                                                                           |
|-----|---------------------------------------------------------------------------------------------------------|---------------------------------------------------|---------------------------------------|-------------------------------------|----------|----------------------------------------------------------------------------------------------------|---------------------------------------------------------------------------------------------------------------------------------------------------------------------------------------------------------------------------------------------|------------------|---------------|-------------------------------------------------------------------------------------------------------------------------------------------------------------------------------------------|
| 61c | c.4332G>A,<br>p.Met1444Ile;<br>c.4333C>T,<br>p.Leu1445Phe,<br>c.2362_2368<br>del,<br>p.Leu788fsX<br>794 | Benign<br>0.013;<br>Possibly<br>damaging<br>0.808 | A=10/G=1<br>2996;<br>T=10/C=1<br>2996 | rs14646<br>7786;<br>rs14620<br>7623 | Paternal | Ectopic<br>posterior<br>pituitary,<br>anterior<br>pituitary<br>hypoplasia                          | Solitary<br>median<br>maxillary<br>central<br>incisor                                                                                                                                                                                       | Not<br>described | GH deficiency | Also with<br>c.2362_2368d<br>el,<br>p.Leu788fsX79<br>4 and with<br>c.4315G>A,<br>p.Ala1439Thr.                                                                                            |
| 61d | c.4332G>A,<br>p.Met1444Ile;<br>c.4333C>T,<br>p.Leu1445Phe,<br>c.2362_2368<br>del,<br>p.Leu788fsX<br>794 | Benign<br>0.013;<br>Possibly<br>damaging<br>0.808 | A=10/G=1<br>2996;<br>T=10/C=1<br>2996 | rs14646<br>7786;<br>rs14620<br>7623 | Unknown  | Ectopic<br>posterior<br>pituitary,<br>anterior<br>pituitary<br>hypoplasia,<br>stalk<br>abnormality | Solitary<br>median<br>maxillary<br>central<br>incisor,<br>cleft lip and<br>palate                                                                                                                                                           | Not<br>described | GH deficiency | Father of a,<br>also with GLI2<br>variant<br>c.2362_2368d<br>el,<br>p.Leu788fsX79<br>4. Sister was<br>born with<br>severe facial<br>malformations<br>and died few<br>hours after<br>born. |
| 62  | c.4558G>A,<br>p.Asp1520Asn                                                                              | Probably<br>damaging<br>1.000                     | A=142/G=<br>12864                     | rs11481<br>4747                     | de novo  | CT<br>normal,<br>left sided<br>anophthalmia,<br>normal<br>neurosy-<br>ch<br>develop-<br>ment       | High<br>forehead,<br>facial<br>asymmetry<br>with<br>hypoplastic<br>left side,<br>left sided<br>anophthal-<br>mia,<br>abnormally<br>modeled<br>ears,<br>bilateral<br>preauricula-<br>r skin tags,<br>Tessier<br>cleft<br>number 7<br>at left | Normal           | None          |                                                                                                                                                                                           |

|     |                            |                               |                  |                 |          |                                                                                                                                                                                                                       |                                                                                                                                                     |                                              |                                           |             |
|-----|----------------------------|-------------------------------|------------------|-----------------|----------|-----------------------------------------------------------------------------------------------------------------------------------------------------------------------------------------------------------------------|-----------------------------------------------------------------------------------------------------------------------------------------------------|----------------------------------------------|-------------------------------------------|-------------|
| 63a | c.4628G>A,<br>P.Arg1543His | Probably<br>damaging<br>1.000 | A=6/G=13<br>000  | rs13898<br>7487 | Paternal | Severe<br>anterior<br>pituitary<br>hypoplasia<br>and<br>absent<br>posterior<br>pituitary<br>and<br>pituitary<br>stalk.<br>Right<br>optic<br>nerve<br>was<br>hypoplastic<br>with<br>absent<br>right<br>sided<br>chiasm | Crowding<br>of midfacial<br>features<br>and<br>antimongoloid<br>slant<br>which<br>resolved                                                          | Normal                                       | GH, TSH, ACTH,<br>FSH, LH<br>deficiencies |             |
| 63b | c.4628G>A,<br>P.Arg1543His | Probably<br>damaging<br>1.000 | A=6/G=13<br>000  | rs13898<br>7487 | Unknown  | Normal                                                                                                                                                                                                                | Normal                                                                                                                                              | Normal                                       | Normal                                    | Father of a |
| 64  | c.4661C>T,<br>p.Pro1554Leu | Probably<br>damaing<br>0.993  |                  |                 | Unknown  | Severe<br>MR,<br>agenesis<br>of the<br>genu of<br>the CC,<br>abnormal<br>develop<br>ment of<br>the<br>ventricula<br>r frontal<br>horns,<br>abnormal<br>gyri                                                           | HiT,<br>epicanthal<br>folds, malar<br>hypoplasia,<br>broad and<br>poorly<br>developed<br>nasal tip,<br>bilateral<br>CL/P,<br>prominent<br>lower lip | Normal                                       | None                                      |             |
| 65a | c.4663T>C,<br>p.Ser1555Pro | Probably<br>damaging<br>0.981 | C=38/T=1<br>2968 | rs14437<br>2453 | Maternal | CT<br>normal,<br>arched<br>eyebrows<br>, down<br>slanted<br>palpebral                                                                                                                                                 | Flat face,<br>maxillary<br>hypoplasia,<br>arched<br>eyebrows,<br>down<br>slanted                                                                    | Right<br>hand<br>preaxial<br>polydactyl<br>y | None                                      |             |

|     |                        |                            |                  |                 |         |                               |                                                                                                                                                  |        |      |          |
|-----|------------------------|----------------------------|------------------|-----------------|---------|-------------------------------|--------------------------------------------------------------------------------------------------------------------------------------------------|--------|------|----------|
|     |                        |                            |                  |                 |         | fissures, epicanthus inversus | palpebral fissures, epicanthus inversus, large ears, low nasal bridge, flat nose, bilateral cleft lip/palate, hypoplastic columella and philtrum |        |      |          |
| 65b | c.4663T>C, p.Ser155Pro | Probably damaging<br>0.981 | C=38/T=1<br>2968 | rs14437<br>2453 | Unknown | Normal                        | Hypotelorism                                                                                                                                     | Normal | None | Mom of a |

AF: anterior fontanelle CC: corpus callosum; CL: cleft lip, CL/P: cleft lip and palate; DD: developmental delay; GH: growth hormone; HoT: hypotelorism; MC: microcephaly; PDA: patent ductus arteriosus; SCI: single central incisor; SDS: standard deviation score
